# Supplementary material for: AAA-ATPase FIDGETIN-LIKE 1 and Helicase FANCM Antagonize Meiotic Crossovers by Distinct Mechanisms
Source: PubMed Central journal article supplement (PMC4498898; doi:10.1371/journal.pgen.1005369), 2015-07-10

Wild type

*figl1-1*

*sds*

*figl1-1 sds*

*fancm-1 sds*

Pachytene

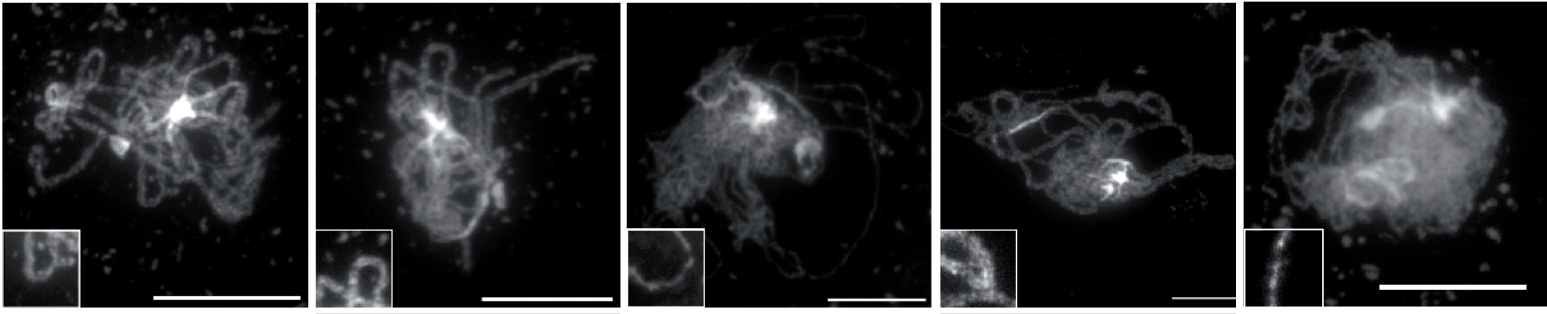

Metaphase I

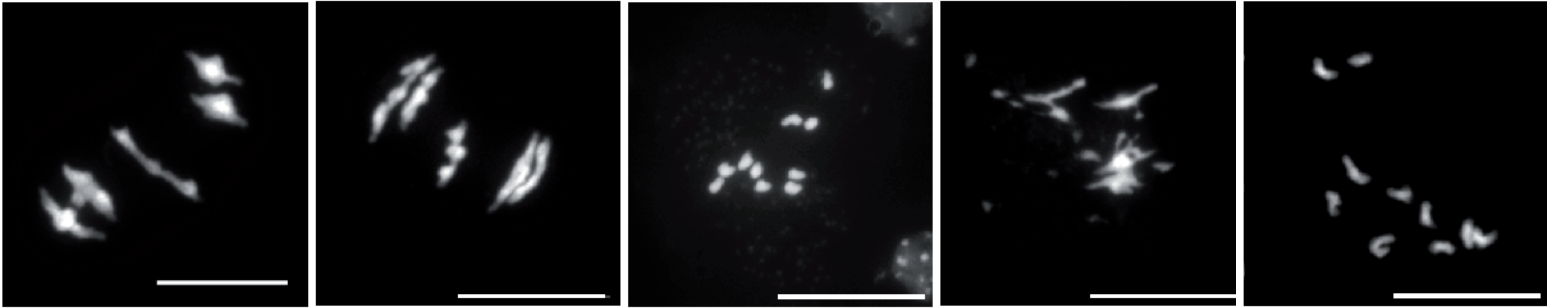

Anaphase I

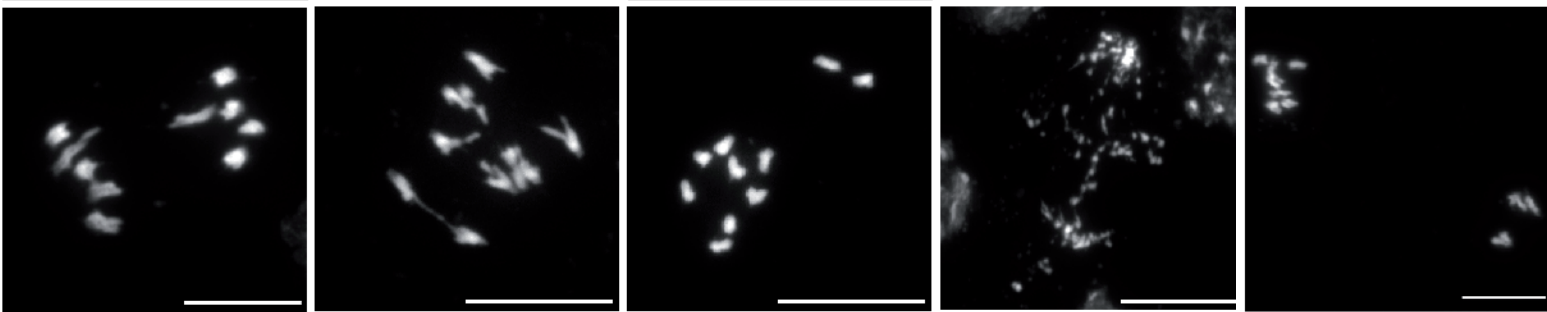

*rad51*

*figl1-1 sds rad51*

*dmc1*

*figl1-1 sds dmc1*

Pachytene

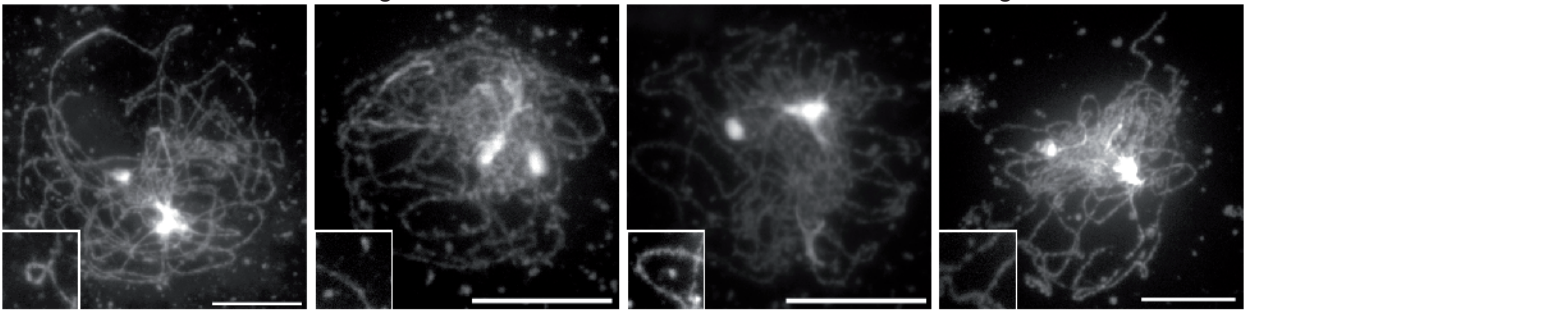

Metaphase I

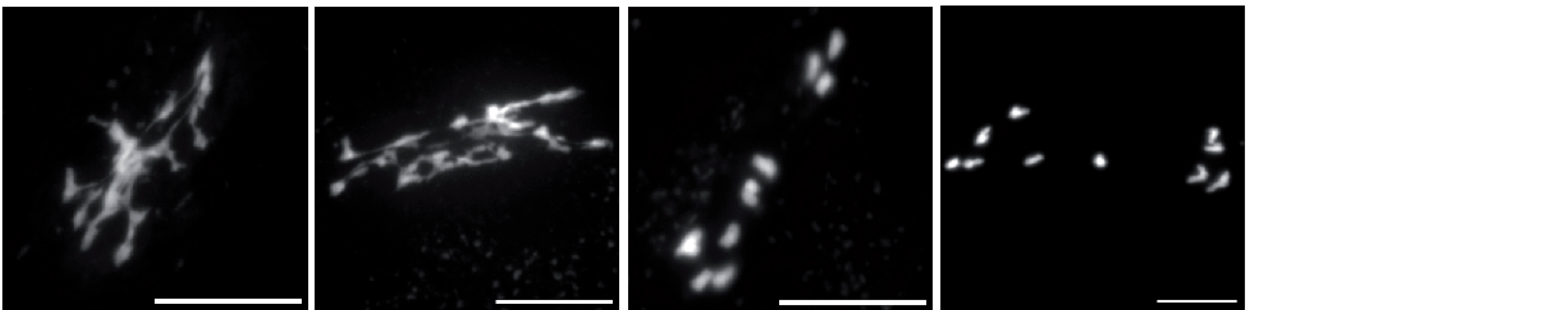

Anaphase I

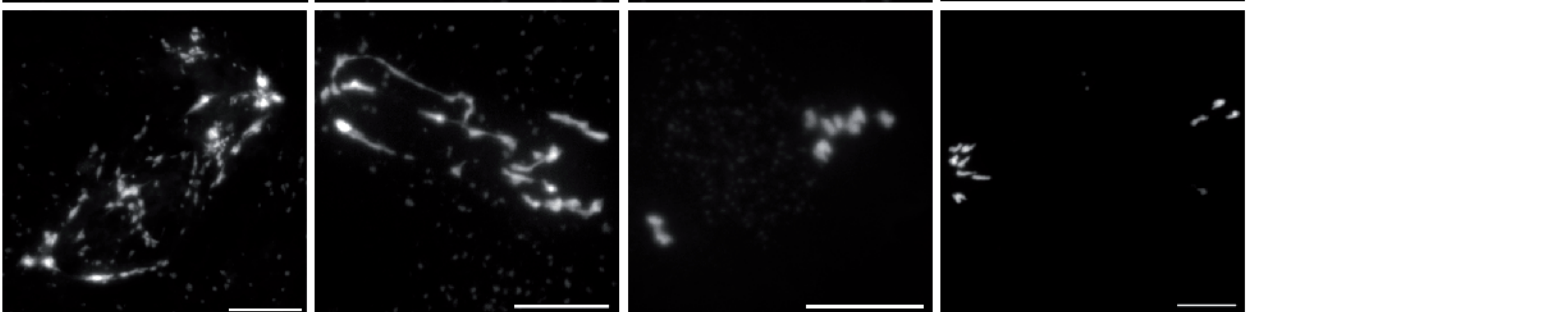

Supplement: pgen.1005369.s007.pdf [file pgen.1005369.s007.pdf]
